# Supplementary material for: Hepatocyte-Derived LRG1 Primes the Liver for Metastasis and Impairs Immunotherapy
Source: Research Square preprint supplement (doi:10.21203/rs.3.rs-7522111/v1), 2025-09-17
Supplement: Supplementary file 1 [file 6ce9e40fdd241e05216998b9.docx]

**Fig S1: Pre-metastatic niche formation in liver with tumor progression in mouse models, related to Fig. 1.**

(A) Representative Images of liver and H&E staining in the liver of CRC orthotopic model. T, tumor. Liver scale bars, 1 cm. H&E scale bars, 50 μm.

(B)Representative Images of liver and H&E staining in the liver of CRC intrasplenic model. T, tumor. Liver scale bars, 1 cm. H&E scale bars, 50 μm.

(C-E) The relative expression of *S100a8*, *S100a9* and *Mmp9* (normalized to *Actin* expression) in liver of CRC orthotopic model was analyzed by qRT-PCR. n=3. Data are means ± SEM.

(F-H) The relative expression of *S100a8*, *S100a9* and *Mmp9* (normalized to *Actin* expression) in liver of sham surgery group was analyzed by qRT-PCR. n=3. Data are means ± SD.

(I) ELISA analysis of serum samples for LRG1 from sham surgery mice at day 5, day 10, day 15 and day 21. n=3. Data are means ± SD.

(J-L) The relative expression of *S100a8*, *S100a9* and *Mmp9* (normalized to *Actin* expression) in liver of CRC intrasplenic model was analyzed by qRT-PCR. n=3. Data are means ± SEM.

p values were obtained by two-tailed unpaired Student’s t test, *p<0.05, **p<0.01, ***p<0.001 and ****p<0.0001.

**Fig S2: Serological LRG1 is associated with pre-metastatic niche formation in liver, related to Fig. 1.**

(A) Schematic of KPC orthotopic model (left). Representative images of livers and orthotopic tumors (upper right). Representative images of IHC staining of FN and immunofluorescence staining of CD11b (Arrows indicate CD11b+ cells) in the liver of KPC orthotopic model (bottom right). Scale bars are as indicated.

(B) qQuantification of FN and CD11b in A, n=3 mice per time point. Data are means ± SD.

(C) The relative expression of *S100a8*, *S100a9* and *Mmp9* (normalized to *Actin* expression) in liver of KPC orthotopic model was analyzed by qRT-PCR. Data are means ± SD.

(D) Schematic of B16F10 orthotopic model (left). Representative images of livers and orthotopic tumors (upper right). Representative images of IHC staining of FN and immunofluorescence staining of CD11b (Arrows indicate CD11b+ cells) in the liver of B16F10 orthotopic model (bottom right). Scale bars are as indicated.

(E) Relative quantification of FN and CD11b in D, n=3-5 mice per time point. Data are means ± SD.

(F) The relative expression of *S100a8*, *S100a9* and *Mmp9* (normalized to *Actin* expression) in liver of B16F10 orthotopic model was analyzed by qRT-PCR. Data are means ± SD.

(G) Western blot detected expression of LRG1 and Actin in liver of HTVi-Ctrl and HTVi-LRG1.

(H) Representative images of IHC staining of FN in the liver of HTVi model.

p values were obtained by two-tailed unpaired Student’s t test, *p<0.05, **p<0.01, ***p<0.001 and ****p<0.0001.

**Fig S3: LRG1 is derived from hepatocytes and promotes CRLM, related to Fig. 2.**

(A) Western blot analysis of LRG1 expression in liver of CRC orthotopic model at different days (day 7, day 14, day 21 and day 28) and CRC intrasplenic model on different days (day 5, day 10, day 15 and day 21). n=3.

(B) The relative expression of *Lrg1* (normalized to *Actin* expression) in liver of KPC orthotopic model at different days (day 5, day 10, day 15 and day 21). Dots represent individual samples. Data are means ± SD.

(C)The relative expression of *Lrg1* (normalized to *Actin* expression) in liver of B16F10 orthotopic model at different days (day 5, day 10, and day 15). Dots represent individual samples. Data are means ± SD.

(D-E) Quantitative real-time PCR and western blot analysis of LRG1 expression in sham surgery group at different days (day 5, day 10, and day 15).

(F)mRNA-seq analysis of *Lrg1* expression in liver of KPC mice (GSE109480).

(G) Relative LRG1 expression in different cells in liver. Data source: The Human Protein Atlas database.

(H) scRNA-seq analysis expression of *Lrg1* in different cells from liver of CRC orthotopic model at different days (day 19 and day 38) (GSE284449).

(I-J) Representative images(I) and relative quantification of IHC staining of LRG1(J) in liver of CRC orthotopic model. Scale bars, 50 μm. Data are means ± SD.

(K-L) Representative images(K) and relative quantification of IHC staining of LRG1(L) in liver of CRC intrasplenic model. Scale bars, 50 μm. Data are means ± SD.

(M-N) Representative images(M) and relative quantification of IHC staining of LRG1(N) in liver of KPC orthotopic model. Scale bars, 50 μm. Data are means ± SD.

(O-P) Representative images(O) and relative quantification of IHC staining of LRG1(P) in liver of B16F10 orthotopic model. Scale bars, 50 μm. Data are means ± SD.

p values were obtained by two-tailed unpaired Student’s t test.

**Fig S4: Hepatic-specific LRG1 depletion in mouse model, related to Fig. 2.**

(A) Schematic diagram of hepatocyte-specific *Lrg1* knockout mouse model.

(B) Western blot detected expression of LRG1 and Actin in liver of *Lrg1*(+/+)Hep, *Lrg1*(+/∆)Hep, and *Lrg1*(∆/∆)Hep mice. n=2.

(C) ELISA analysis of serum samples for LRG1 from *Lrg1*(+/+)Hep, *Lrg1*(+/∆)Hep, and *Lrg1*(∆/∆)Hep mice. n=2.

(D) Representative images of orthotopic tumors in Figure 2F.

**Fig S5: Hepatic LRG1 drives the formation of pre-metastatic niche in the liver, related to Fig. 3.**

(A) Cell type annotation markers.

(B) Proportion of immune cell subpopulations in each groups.

(C-D) Quantification of Neutrophils by flow cytometry in liver of mice. Data are means ± SD.

(E) Example expression dynamics of selected genes along neutrophil pseudotime.

(F-G) Quantification of T cells, and PD1+ T cells by flow cytometry in liver of mice. Data are means ± SD.

(H) Heatmap of M-MDSC genes in monocytes of each groups.

(I) Heatmap of tolerogenic DC genes in DCs of each groups.

(J) Gene Ontology (GO) analysis of enriched pathways of endothelial cells in liver from *Lrg1*(+/+)Hep-PMN and *Lrg1*(+/+)Hep-Ctrl group.

(K) Heatmap of angiogenesis and inflammatory genes in endothelial cells of each group.

p values were obtained by two-tailed unpaired Student’s t test, *p<0.05, **p<0.01, ***p<0.001 and ****p<0.0001.

**Fig S6: LRG1 promotes NET formation of neutrophils via TGFBR/AKT signaling, related to Fig. 4.**

(A) Gene Ontology (GO) analysis of enriched pathways of neutrophils in liver from *Lrg1*(+/+)Hep-PMN and *Lrg1*(+/+)Hep-Ctrl group.

(B) KEGG pathway analysis from bulk RNA-seq of metastasis liver or sham liver, highlighting significant alteration in NETs.

(C-D) Immunofluorescence analyses of NET formation in liver metastases from CRC intrasplenic model of *Lrg1*(+/+)Hep and *Lrg1*(∆/∆)Hep mice. Representative images of liver area(C). Quantification of MPO+ H3cit+ cells(D). scale bars, 50 μm. Dots represent individual samples. Data are means ± SD.

(E) Western blot analysis showing the expression of H3cit and actin in human neutrophils and dHL60 treated with or without rhLRG1.

(F) Western blot analysis showing the expression of LRG1 and actin in AML12-ctrl, AML12-LRG1oe cells and conditioned medium.

(G) Immunofluorescence analyses of NET formation in murine neutrophils cocultured with or without AML12-ctrl or AML12-LRG1oe cells.

(H) scRNA-seq analysis expression of *Egfr*, *Adgrl2*, *Eng* and *Tgfbr2* in neutrophils.

(I) Western blot detected expression of H3cit and actin in dHL60-shTGFBR2 cells treated with or without LRG1-CM.

(J) Western blot analysis showing the expression of H3cit, p-AKT, t-AKT, p-ERK, t-ERK, p-p38, t-p38 and actin in dHL60 treated with or without rhLRG1.

(K) Western blot analysis showing the expression of H3cit, p-AKT, t-AKT and actin in dHL60 treated with or without rhLRG1 and MK2206.

(L-M) Immunofluorescence analyses of NETs formed by human neutrophils treated with or without rhLRG1 and MK2206. Scale bars, 100 μm. Dots represent field of view (FOV). Data are means ± SD.

p values were obtained by two-tailed unpaired Student’s t test, *p<0.05, **p<0.01, ***p<0.001 and ****p<0.0001.

**Fig S7: LRG1 promotes tumor cell migration through directing NET formation of neutrophils, related to Fig. 4.**

1. C) Schematic of transwell migration assays (A). Transwell migration assays of DLD-1 and HCT116 cells treated under the indicated conditions (B and C). Neu, neutrophils. n=3 independent experiments. Scale bars, 50 μm. Data are means ± SD.

(D-E) Western blot detected expression of CCDC25 and actin in DLD-1-sgCCDC25 and HCT116-sgCCDC25 cells.

(F-G) Transwell migration assays of HCT116-sgCCDC25 cells treated with depicted condition (F and G). Neu, neutrophils. n=3 independent experiments. Scale bars, 50 μm. Data are means ± SD.

(H) Neutrophils were quantified by flow cytometry in peripheral blood of mice indicated in Fig 4N. Data are means ± SD.

p values were obtained by two-tailed unpaired Student’s t test, *p<0.05, **p<0.01, ***p<0.001 and ****p<0.0001.

**Fig S8: The IL6/STAT3 pathway promotes expression of LRG1 in hepatocytes, related to Fig. 5.**

(A) Cytokine array analysis of serum from CRC orthotopic mice model (day 7, day 14, day 21 and day 28) and from CRC intrasplenic mice model (day 5, day 10, day 15 and day 21).

(B-D) The relative expression of *Il6*, *Lrg1* and *S100a9* (normalized to *Actin* expression) in liver of HTVi IL6-oe mice model was analyzed by qRT-PCR. n=3. Data are means ± SD.

**Fig S9: Targeting LRG1 reduces colorectal cancer liver metastasis, related to Fig. 6.**

1. ELISA analysis of serological levels of LRG1 in mice. Data are means ± SD.

(B-C) Representative images (B) and quantification (C) of Immunofluorescence staining of MPO (green) and H3cit (red) in liver. n=5 per group. DAPI is shown in blue. Scale bars, 100 μm. Dots represent field of view (FOV). Data are means ± SD.

p values were obtained by two-tailed unpaired Student’s t test.

(D) Representative images of orthotopic tumors in Figure 6E.
