# Supplementary material for: Hepatocyte-Derived LRG1 Primes the Liver for Metastasis and Impairs Immunotherapy
Source: Research Square preprint supplement (doi:10.21203/rs.3.rs-7522111/v1), 2025-09-17
Supplement: Supplementary file 2 [file 8734bbb37293a3893ca0a00c.docx]

Table S1 Primer sequences. Primer sequences used in qRT-PCR and PCR assays.

| **Gene** | **Forward primer (5’-3’)** | **Reverse primer (5’-3’)** | **Application** |
| --- | --- | --- | --- |
| *S100A8* | CTTCAAGACATCGTTTGAAAGG | AGACATCAATGAGGTTGCTC | qRT-PCR |
| *S100A9* | GCACAGTTGGCAACCTTTATG | TGATTGTCCTGGTTTGTGTCC | qRT-PCR |
| *MMP9* | TGATGTTATGATGGTCCCACTTG | GCAGAGGCATACTTGTACCG | qRT-PCR |
| *ACTIN* | CATTGCTGACAGGATGCAGAAGG | TGCTGGAAGGTGGACAGTGAGG | qRT-PCR |
| *LRG1* | CCATGTCAGTGTGCAGATTC | AAGAGTGAGAGGTGGAAGAG | qRT-PCR |
| *IL6* | TACCACTTCACAAGTCGGAGGC | CTGCAAGTGCATCATCGTTGTTC | qRT-PCR |
| **Genotyping primers** |  |  |  |
| *Alb*cre | TGGATGCCACCTCTGATGAAGTC | TCCTGGCATCTGTCAGAGTTCTCC | PCR |
| *Alb*cre | GGCCTCCAAGTCTTGACAGTAGAT | CTTGTGGGTCTTCCACCTTTCTTC | PCR |
| *LRG1*fl/fl | CAGGCTTGAGGCTTTGGTCATA | CCCTATCTCCCTAGTTGTCTGTTCAG | PCR |

Table S2 Sequences of sgRNA

| gRNA | Sequences (5’-3’) |
| --- | --- |
| *CCDC25-gRNA-1* | caccgGATGCGAGTGCCTCTTCCCG |
| *CCDC25-gRNA-2* | caccgGCGCTCAACTCACGAAGCTC |

Table S3 Antibodies. The catalogue numbers and dilutions of antibodies

| Antibody | Manufacturer | Catalog | Application |
| --- | --- | --- | --- |
| Anti-CD11b | Abcam | ab128797 | IF:(1:200) |
| Anti-Fibronectin | Servicebio | GB114491 | IHC:(1:200) |
| Anti-LRG1(mouse) | Abcam | ab231188 | WB:(1:1000)  IHC:(1:500) |
| Anti-β-Actin | Sigma | A5441 | WB:(1:5000) |
| Anti-CD45 | Biolegend | 103116 | FACS:(1:50) |
| Anti-Ly6G | BD | 560603 | FACS:(1:50) |
| Anti-CD11b | BD | 562950 | FACS:(1:50) |
| Anti-CD3e | BD | 561100 | FACS:(1:50) |
| Anti-CD8a | BD | 563234 | FACS:(1:50) |
| Anti-PD1 | Biolegend | 135241 | FACS:(1:50) |
| Anti-MPO | R&D systems | AF3667 | IF:(10ug/ml) |
| Anti-H3cit | Abcam | ab5103 | IF:(1:100)  WB:(1:1000) |
| Anti-LRG1(human) | Abcam | ab178698 | IF:(1:200) |
| Anti-CCDC25 | Proteintech | 21209-1-AP | WB:(1:2000) |
| Anti-p-AKT | CST | 4060 | WB:(1:1000) |
| Anti-AKT | CST | 9272 | WB:(1:1000) |
| Anti-p-ERK | CST | 4370 | WB:(1:1000) |
| Anti-ERK | CST | 4695 | WB:(1:1000) |
| Anti-p-p38 MAPK | CST | 9212 | WB:(1:1000) |
| Anti-p38 MAPK | CST | 4511 | WB:(1:1000) |
| Anti-p-STAT3 | CST | 9145 | WB:(1:1000)  IHC:(1:50) |
| Anti-STAT3 | CST | 9139 | WB:(1:1000) |
| Anti-CD8a | CST | 9894 | TSA:(1:2000) |
| Anti-GZMB | CST | 1721 | TSA:(1:2000) |

.
